1 **Dorsal striatum and the temporal expectancy of an aversive event in Pavlovian**  
2 **odor fear learning**

3

4 Julie Boulanger-Bertolus<sup>1\*§</sup>, Sandrine Parrot<sup>1</sup>, Valérie Doyère<sup>2,3</sup>, Anne-Marie Mouly<sup>1</sup>

5 <sup>1</sup> Lyon Neuroscience Research Center, INSERM U1028, CNRS UMR 5292, University Lyon 1,  
6 Lyon 69366, France

7 <sup>2</sup> Université Paris-Saclay, CNRS, Institut des Neurosciences Paris-Saclay, 91190, Gif-sur-  
8 Yvette, France.

9 <sup>3</sup> NYU Child Study Center Department of Child and Adolescent Psychiatry, New York University  
10 Langone School of Medicine, New York, USA.

11

12

13 \* Corresponding author: Julie Boulanger-Bertolus ([jboulangerbertolus@gmail.com](mailto:jboulangerbertolus@gmail.com))

14 § Present address: Department of Anesthesiology, Center for Consciousness Science,  
15 University of Michigan, Ann Arbor, MI, USA

16

17 **Abstract**

18 Interval timing, the ability to encode and retrieve the memory of intervals from seconds to  
19 minutes, guides fundamental animal behaviors across the phylogenetic tree. In Pavlovian fear  
20 conditioning, an initially neutral stimulus (conditioned stimulus, CS) predicts the arrival of an  
21 aversive unconditioned stimulus (US, generally a mild foot-shock) at a fixed time interval.  
22 Although some studies showed that temporal relations between CS and US events are learned  
23 from the outset of conditioning, the question of the memory of time and its underlying neural  
24 network in fear conditioning is still poorly understood. The aim of the present study was to  
25 investigate the role of the dorsal striatum in timing intervals in odor fear conditioning in male  
26 rats. To assess the animal's interval timing ability in this paradigm, we used the respiratory  
27 frequency. This enabled us to detect the emergence of temporal patterns related to the odor-  
28 shock time interval from the early stage of learning, confirming that rats are able to encode the  
29 odor-shock time interval after few training trials. We carried out reversible inactivation of the  
30 dorsal striatum before the acquisition session and before a shift in the learned time interval, and  
31 measured the effects of this treatment on the temporal pattern of the respiratory rate. In  
32 addition, using intracerebral microdialysis, we monitored extracellular dopamine level in the  
33 dorsal striatum throughout odor-shock conditioning and in response to a shift of the odor-shock

34 time interval. Contrary to our initial predictions based on the existing literature on interval timing,  
35 we found evidence suggesting that transient inactivation of the dorsal striatum may favor a more  
36 precocious buildup of the respiratory frequency's temporal pattern during the odor-shock interval  
37 in a manner that reflected the duration of the interval. Our data further suggest that the  
38 conditioning and the learning of a novel time interval were associated with a decrease in  
39 dopamine level in the dorsal striatum, but not in the nucleus accumbens. These findings prompt  
40 a reassessment of the role of the striatum and striatal dopamine in interval timing, at least when  
41 considering Pavlovian aversive conditioning.

42

43 **Keywords:** Interval timing, odor fear conditioning, respiration, dorsal striatum, dopamine  
44 microdialysis.

## 45 Introduction

46 Learning time intervals is crucial to survival and goal reaching across the phylogenetic tree.  
47 In Pavlovian fear conditioning, an initially neutral stimulus predicts the arrival of an aversive  
48 unconditioned stimulus, after a time interval that is encoded, a process pertaining to interval  
49 timing (Molet & Miller, 2014; Kirkpatrick & Balsam, 2016). How the brain processes and  
50 encodes such information remains poorly understood (Merchant et al., 2013; Tallot & Doyère,  
51 2020). From a neurobiological point of view, there is substantial support for the involvement of  
52 the dorsal striatum and its dopaminergic inputs in interval timing (Buhusi & Meck, 2005), both  
53 from lesion experiments of the dorsal striatum or intrastriatal infusion of dopaminergic  
54 antagonists (De Corte et al., 2019; Meck, 2006), and from lesion or optogenetic manipulation of  
55 the substantia nigra pars compacta (SNc), the primary source of dorsostriatal dopamine (Meck,  
56 2006; Soares et al., 2016). Electrophysiological recordings of single neurons in the dorsal  
57 striatum of rats also show that striatal neurons firing rate is correlated with the duration of the  
58 time interval between signaling cue and reward (Bakhurin et al., 2017; Gouvêa et al., 2015;  
59 Matell et al., 2003; Mello et al., 2015), and intrastriatal muscimol infusions produce an  
60 impairment in the animals' ability to discriminate durations (Gouvêa et al., 2015). In the context  
61 of fear conditioning, using 2-Deoxyglucose (2-DG) metabolic mapping we previously showed  
62 that odor-shock pairing in rats was associated with an increase in 2-DG uptake in the dorsal  
63 striatum (Boulanger Bertolus et al., 2014). Furthermore, recent work recording oscillatory neural  
64 activity in the dorsal striatum in Pavlovian fear conditioning correlated its maximum power in  
65 theta and gamma bands with the time at which the rat expected the aversive stimulus (Dallérac  
66 et al., 2017). Timing in fear conditioning is also associated with plasticity in the striatum  
67 (Dallérac et al., 2017).

68 Notably, a majority of studies investigating the neurobiological substrate of interval timing in  
69 rodent models rely on operant conditioning. Such protocol relies heavily on the motor response  
70 of the subject, which could bias our understanding of the neural substrate of interval timing *per*  
71 *se*. Indeed, the striatum and cortico-striatal inputs are also a neural substrate for motor and  
72 procedural learning (Barnes et al., 2005; Koralek et al., 2013; Martiros et al., 2018), and action  
73 selection when the task involves temporal discrimination (Howard et al., 2017). To avoid these  
74 possibly confounding factors, we used a non-striatum-dependent behavioral measure, the  
75 respiratory frequency, to assess the animal's interval timing ability in a Pavlovian fear  
76 conditioning associating an odor to a mild footshock. Indeed, the pattern of respiratory  
77 frequency has been shown to be a good index of the animal's temporal expectation of the shock

78 arrival (Boulanger Bertolus et al., 2014; Dupin et al., 2020; Shionoya et al., 2013). This allowed  
79 us to look more closely at the role of dorsal striatum and its dopamine level in the initial  
80 acquisition of an interval duration, as well as when a change in this duration is applied. Based  
81 on the existing literature, we made two hypotheses 1) inactivating the dorsal striatum should  
82 impair timing behavior and its adaptation to a new interval duration and 2) dopamine level in the  
83 dorsal striatum should increase when a new interval duration is introduced. We report that, while  
84 a transient inactivation of the striatum did alter the expression of the temporal pattern of  
85 respiration, and dopamine level in the striatum was indeed modulated during the learning of a  
86 new duration, the directions of the effects were the opposite of those hypothesized. These  
87 findings prompt a reconsideration of the role of the striatum and striatal dopamine in interval  
88 timing, at least when considering Pavlovian aversive conditioning.

89

## 90 **Methods**

### 91 **Animals**

92 Twenty-five pair-housed and fifteen single-housed male Long Evans rats (Janvier, France)  
93 contributed data for experiment 1 and 2 respectively. They weighed 250-300 g at the start of the  
94 experimentation, were housed at 23°C under a 12h light–dark cycle, and food and water were  
95 available *ad libitum*. All experiments and surgical procedures were conducted in strict  
96 accordance with the 2010/63/EU Council Directive Decree and the French National Committee  
97 (87/848) for care and use of laboratory animals. The experiments were carried out under the  
98 approval of Direction of Veterinary Service (#69000692), and care was taken at all stages to  
99 minimize stress and discomfort to the animals.

### 100 **Surgery**

101 Details of the procedures can be found in the supplementary methods. Briefly, animals were  
102 anesthetized, received subcutaneous local analgesia and were placed in a stereotaxic frame.  
103 For experiment 1, rats were implanted bilaterally in the dorsal striatum with stainless steel guide  
104 cannulae. For experiment 2, rats were implanted unilaterally (left side) with a guide cannula  
105 targeting the dorsal striatum. To assess the specific involvement of the dopaminergic system  
106 innervating the dorsal striatum in this task, control rats were implanted in the nucleus  
107 accumbens which receives abundant dopaminergic inputs, albeit from another source, the  
108 ventral tegmental area (VTA). All animals were allowed two weeks of post-surgical recovery.  
109 During this period, the animals' behavioral state was daily monitored and scored, and if any sign  
110 of suffering was detected, the animal was injected with 2-4mg/kg carprofen i.p.

## 111 Experimental apparatus and paradigm

112 The experimental cages (described in previous studies (Hegoburu et al., 2009, 2011) and  
113 detailed in the supplementary methods) consist of a whole-body plethysmograph for Experiment  
114 1 and Plexiglass cylinder for Experiment 2, both customized with tubing in the ceiling connected  
115 to a programmable custom olfactometer, and a shock floor. In this setup, rats underwent odor  
116 fear conditioning.

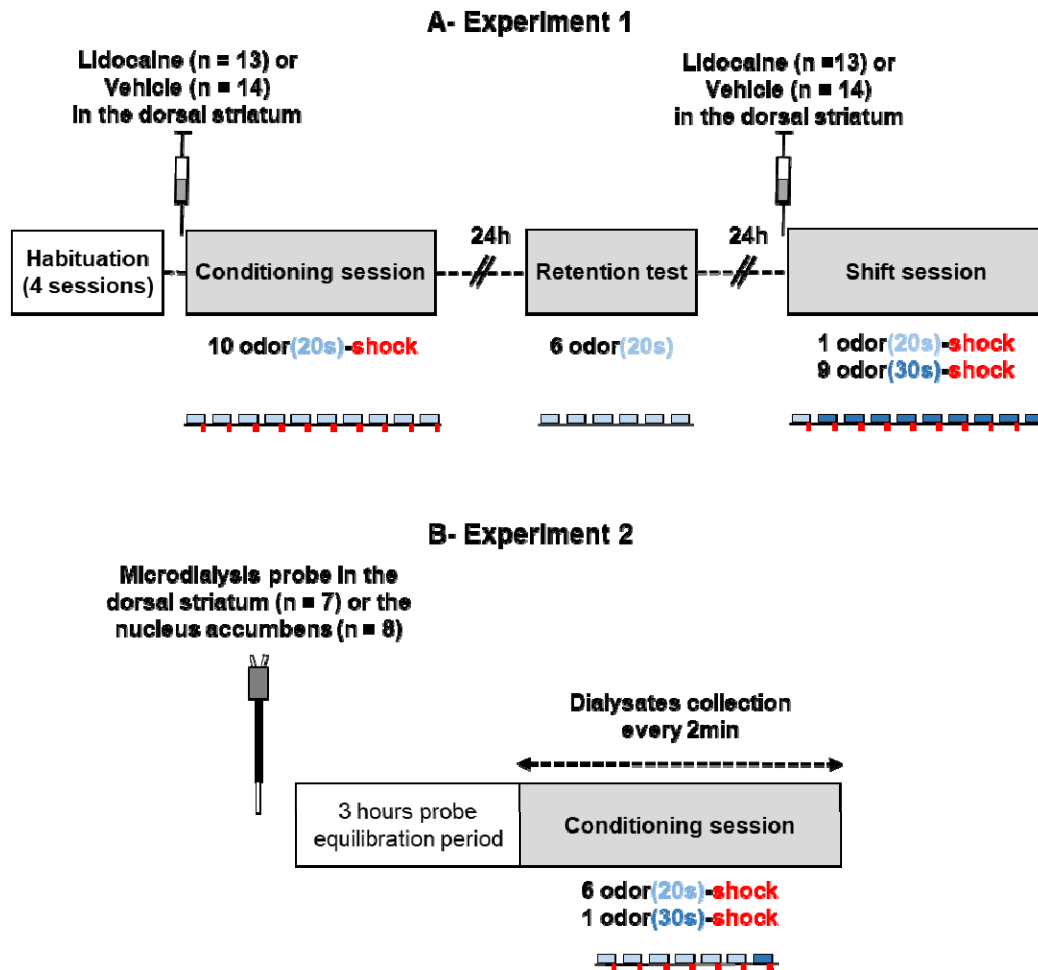

**Figure 1:** A) Training protocol for Experiment 1. After a period of habituation to the experimental setup for four 20-min sessions, animals were injected with either lidocaine or vehicle in the dorsal striatum, and immediately trained with 10 Odor-Shock pairings using a 20-s odor-shock interval (Conditioning session). Twenty-four hours later, they received 6 presentations of the odor alone to assess their learned fear to the odor (Retention test). Forty-eight hours after conditioning, they were re-injected with the same drug they received previously, and trained in a Shift session where they received 1 odor-shock pairing with a 20-s odor-shock interval followed by 9 odor-shock pairings with a 30-s interval. B) Training protocol for Experiment 2. The microdialysis probe was inserted in the left dorsal striatum or left nucleus accumbens and the animals were placed in the experimental cage for a 3h probe equilibration period after which they were trained with 6 Odor-Shock pairings with a 20-s interval,

followed with a single Odor-Shock pairing with a 30-s interval.

117

118 For Experiment 1 (Figure 1A), after familiarization to the conditioning cage, the animals  
119 received a Conditioning session (ten odor-shock pairings with a 20s odor-shock interval), a  
120 Retention test (six odor presentations) and a Shift session (one 20-s odor-shock pairing,  
121 followed by nine 30-s odor-shock pairings) at 24h intervals. They were injected with 0.5  $\mu$ L of  
122 either lidocaine (2%, Sigma-Aldrich France, in sterile saline 0.9%, Lidocaine group, n = 13) or  
123 saline (Control group, n = 14) just before the Conditioning and Shift sessions. During each  
124 session, the animal's behavior and respiratory rate were continuously recorded for offline  
125 analysis.

126 For Experiment 2 (Figure 1B), after a 3-hour probe equilibration period, rats received a  
127 conditioning session including six 20-s odor-shock pairings, followed by one 30-s odor-shock  
128 pairing. Dialysates from the dorsal striatum (n = 7) and the nucleus accumbens (n = 8) were  
129 collected every 2 min.

130 At the end of the experiment, the animals were sacrificed with a lethal dose of pentobarbital  
131 for histological verification of the canulae tips localization (Figure S1 and S2 for Experiment 1  
132 and 2 respectively).

### 133 **Data acquisition, pre-processing and analysis**

134 In Experiment 1, the respiratory signal and behavior were analyzed as described before  
135 (Boulanger Bertolus et al., 2014). We assessed the effects of treatment on the temporal  
136 dynamics of the respiratory frequency from the odor onset to shock arrival. For this analysis, the  
137 time course of the respiratory frequency, in 1-s time bins, during the 19 seconds of the odor-  
138 shock interval was compared using a two-way ANOVA with Group (Lidocaine or Control) as an  
139 independent factor, and Time (1 to 19 seconds) as a repeated measure factor. During the  
140 Retention test, the freezing rate was analyzed using a two-way ANOVA with Group as an  
141 independent factor, and Period (Pre-Odor vs Odor) as a repeated measure factor. For the Shift  
142 session, a three-way ANOVA was performed with Group as an independent factor, and Time (1  
143 to 19 seconds) and Interval (20s vs 30s) as repeated measures factors.

144 In Experiment 2, microdialysis data were acquired as previously described to accurately  
145 correlate the neurochemical data with the behavioral events (Parrot et al., 2004; Hegoburu et  
146 al., 2009; Hegoburu, Denoroy, et al., 2014), using homemade concentric microdialysis probes  
147 (see supplementary methods) continuously infused with artificial cerebrospinal fluid (aCSF).  
148 Dialysates were collected in PCR tubes rinsed with an acidic preservative medium, and stored

149 at -30°C until analysis using ultra-high-performance liquid chromatography (see supplementary  
150 methods).

151 Data were expressed as percentage of the baseline obtained by averaging the dopamine  
152 concentrations measured in the seven samples collected before the start of the conditioning.  
153 Changes in dopamine concentration were then analyzed using a two-way ANOVA with  
154 Structure (dorsal striatum or nucleus accumbens) as an independent factor, and Time as a  
155 repeated measure factor.

156 All ANOVA results are reported in the legend of the corresponding figures. For all statistical  
157 comparisons performed, post-hoc pairwise comparisons were carried out when allowed by the  
158 ANOVA results, the significance level being set at 0.05.

159

## 160 Results

### 161 **Experiment 1: Reversible inactivation of the dorsal striatum during the shift** 162 **session hastens the adaptation of the respiratory temporal curve to the new** 163 **interval duration**

164 We previously showed that adult rats submitted to an odor fear conditioning exhibit a typical  
165 temporal respiratory frequency pattern (using 1-s time bins) during the odor-shock interval,  
166 consisting in a rapid respiratory frequency increase upon odor delivery and a U-shaped  
167 decrease just before shock arrival (Boulangier Bertolus et al., 2014; Shionoya et al., 2013). We  
168 assessed the effects of dorsal striatum inactivation on this respiratory temporal pattern.

169 During the Conditioning session, rats with lidocaine-inactivated dorsal striatum exhibited the  
170 typical temporal respiratory frequency pattern as early as within the first 3 trials following the first  
171 odor-shock presentation (Figure 2A). Within-group comparisons showed that the respiratory rate  
172 increased in response to odor arrival in both groups ( $p < 0.05$  from second 4 on), but contrary to  
173 the Control group, the Lidocaine group showed a U-shaped decrease preceding shock arrival  
174 (significant difference between seconds 8-10 and seconds 15-18). Importantly, the temporal  
175 patterns of respiration were similar in both groups by the end of the session, as well as in  
176 subsequent odor presentations (Figure S3). Furthermore, during the Retention test, 24h later,  
177 both the experimental and control groups showed a significant increase of freezing to the odor  
178 compared to the pre-odor baseline (Figure 2B), suggesting a similarly strong odor-shock  
179 association in the two groups.

180 For the Shift session, we compared the mean respiratory frequency temporal pattern  
181 obtained during the two first trials (in which the two groups expected the shock at 20s and

182 presented similar respiratory patterns, see Figure S3C) with that obtained during the next three  
183 odor-shock pairings during which the animals experienced the shock at 30s. The data showed  
184 an early adaptation to the new duration in the Lidocaine group, but not in the Control group  
185 (Figure 2C). The scalar rule, a hallmark of interval timing according to which the error in  
186 estimating a duration is proportional to the timed duration, predicts a superior superposition of  
187 patterns of responses to different time intervals when the time axis is normalized than when it is  
188 absolute (Gibbon, 1977). To assess this, the time axis for the 30-s data was multiplicatively  
189 rescaled to fit that of the 20-s data (Figure S4) and superposition was indexed by eta-squared  
190 ( $\eta^2$ ) as described before (Boulanger Bertolus et al., 2014; Brown et al., 1992; Shionoya et al.,  
191 2013). This analysis indicated that the scalar property was respected for the Lidocaine group,  
192 but not for the Control group, further confirming that the shift occurred earlier in the Lidocaine  
193 group (Figure S4A). Importantly, by the end of the Shift session the temporal patterns of the  
194 respiratory response were not different between groups, and the scalar property was respected  
195 for both group (Figure S4B).

196 Together, these data suggest that reversible inactivation of the dorsal striatum hastens an  
197 adaptation of the respiratory temporal curve to a newly presented interval duration.

198



### A. Conditioning session

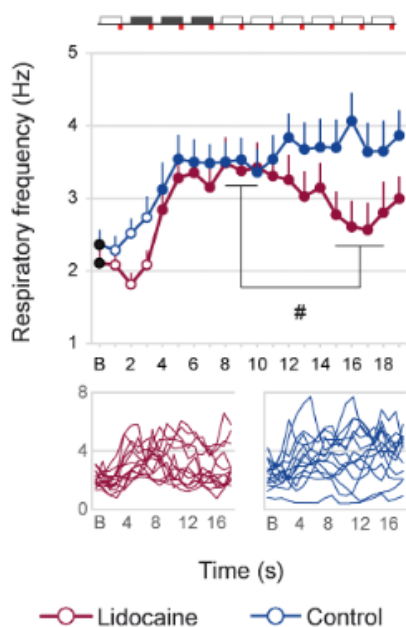

### C. Shift session - early trials

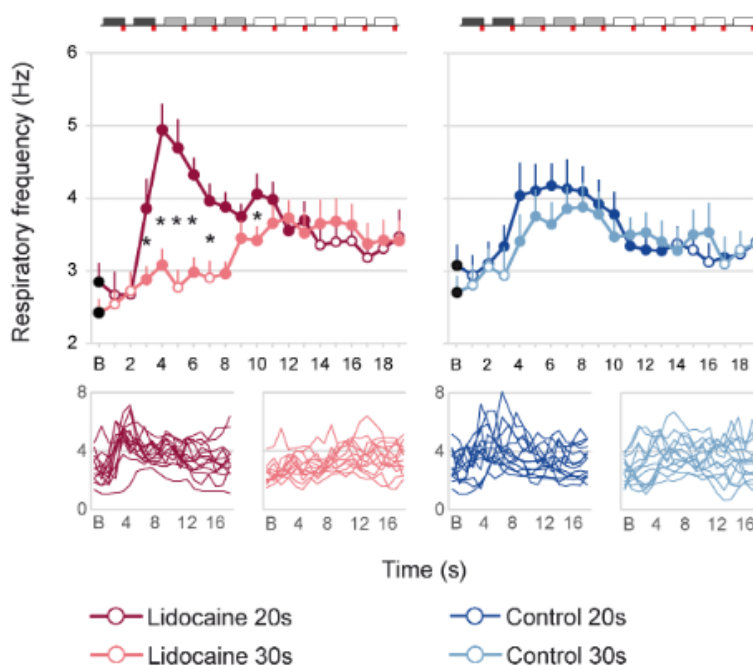

### B. Retention session

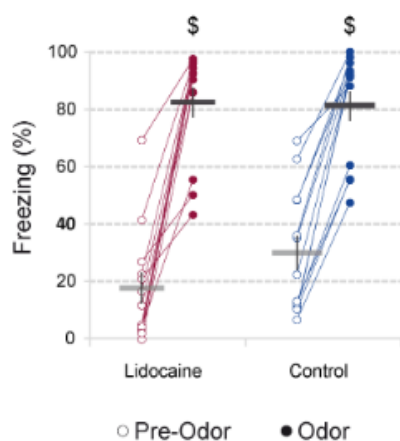

### D. Shift session - late trials

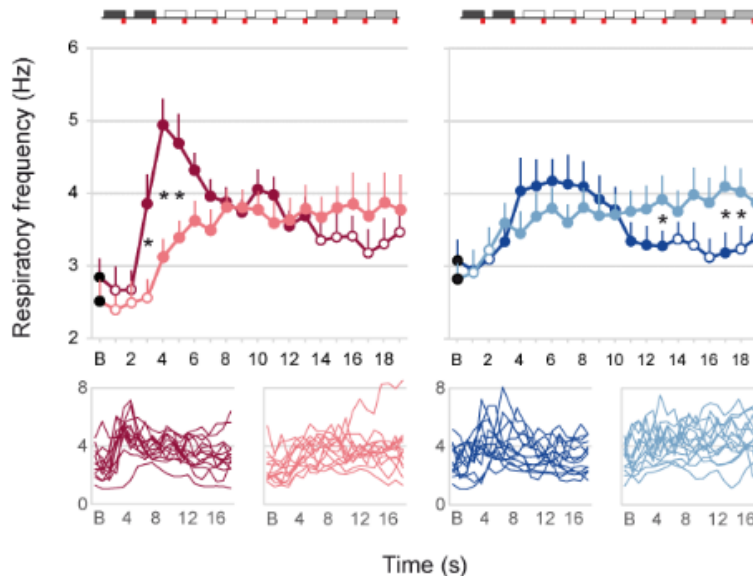

**Figure 2:** A) Respiratory frequency time course during the 20-s Odor-Shock interval of the Conditioning session, pooled over the 2nd, 3rd and 4th trials (as shown on the schema over the graph), for the Lidocaine (red) and Control (blue) groups. The baseline (B, black dots) corresponds to the average respiratory frequency over the 25s preceding the odor onset. A two-way ANOVA revealed a tendency for a significant Group x Time interaction ( $F_{18,450} = 1.54$ ,  $p = 0.07$ ). Filled dots are significantly different from baseline,  $p < 0.05$ . Inserts represent individual curves. # Significant difference between designated points,  $p < 0.05$ . B) Mean percentage of freezing per minute during the 2min period preceding the first odor presentation (Pre-Odor) and during the 6min during which 20-s odor presentations are applied at the

beginning of each minute (Odor). The ANOVA confirmed a significant effect of Period ( $F_{1,24} = 175.4$ ,  $p < 0.001$ ), but no effect of Group ( $F < 1$ ) and no significant Period x Group interaction ( $F_{1,24} = 2.24$ ,  $p = 0.15$ ).  
§Significant difference between Pre-Odor and Odor periods,  $p < 0.05$ . C) Early shift: Respiratory frequency time course during the 20-s (dark colors; first 2 trials) versus 30-s (light colors; following 3 trials). Odor-Shock interval at the early stage of the Shift session, for the Lidocaine group (Left panel, red) and the Control group (Right panel, blue). A three-way ANOVA confirmed a significant Interval x Time x Group interaction ( $F_{18,450} = 1.84$ ,  $p = 0.019$ ). Follow-up analyses showed a significant Interval x Time interaction in the Lidocaine group ( $F_{18,216} = 8.57$ ,  $p < 0.001$ ), but not in the Control group ( $F < 1$ ). (D) Late shift: Respiratory frequency time course during the 20-s (dark colors; first 2 trials) versus 30-s (light colors; last three trials) Odor-Shock intervals at the late stage of the Shift session, for the Lidocaine group (Left panel, in red) and the Control group (Right panel, in blue). The analysis showed an Interval x Time interaction comparing the 20-s trials with the last three trials of the shift ( $F_{18,450} = 64.19$ ,  $p < 0.001$ ), but no Group x Time interaction ( $F_{18,450} = 14.57$ ,  $p = 0.13$ ) nor Group x Interval x Time interaction ( $F_{18,450} = 12.41$ ,  $p = 0.54$ ), confirming that both groups shifted their anticipatory response towards the new interval by the end of the Shift session. Filled dots are significantly different from baseline (i.e. black dots,  $p < 0.05$ ). \* Significant between intervals difference ( $p < 0.05$ ).

199

## 200 **Experiment 2: Modulation of striatal dopamine level during the acquisition of a** 201 **new duration**

202 We then monitored dopamine content in dorsal striatum and nucleus accumbens using  
203 intracerebral microdialysis with a 2-min sampling rate, during the acquisition session. The  
204 session included seven odor-shock pairings, six pairings with a 20-s odor-shock interval and the  
205 last pairing with a 30-s odor-shock interval. Such analysis revealed significant differences in  
206 dopamine modulation throughout the session, between the dorsal and ventral (nucleus  
207 accumbens) striatum (Figure 3A). Structure-specific analyses showed significant modulation of  
208 the dopamine level throughout the conditioning in the dorsal striatum, but not in the nucleus  
209 accumbens. Post-hoc analysis in the dorsal striatum showed that dopamine level decreased  
210 from the beginning of the conditioning, reaching significant differences from baseline from  
211 sample 5 (3<sup>rd</sup> odor-shock presentation) to 10 (except sample 9) after conditioning onset.  
212 Dopamine level then slowly re-increased for samples 11 and 12. Interestingly, the last odor-  
213 shock pairing for which the interval was shifted to 30s instead of 20s (sample 13) was  
214 associated with a significant drop in dopamine level (significant difference with preceding  
215 sample,  $p = 0.046$ , and following sample,  $p = 0.016$ , Figure 3B). More specifically, this drop was  
216 observed for 6 out of 7 animals (Figure 3B right panel).

217

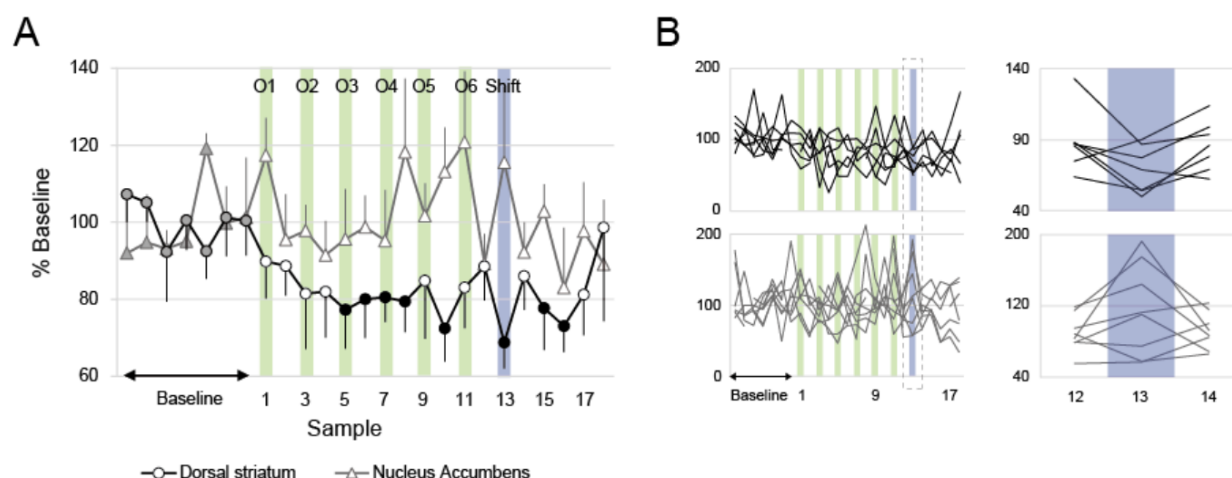

**Figure 3:** A. Dopamine level in the dorsal striatum (circles, black) and the nucleus accumbens (triangles, grey) during Experiment 2. Dopamine level is measured every two minutes and expressed as a percentage of baseline level measured during the 14min preceding the first Odor-Shock presentation (grey filled symbols). The session included six 20-s Odor-Shock pairings (O1 to O6, green vertical lines) and one 30-s Odor-Shock pairing (Shift, blue vertical line). A two-way ANOVA revealed a significant difference between Structures ( $F_{1,13} = 9.79$ ,  $p = 0.008$ ), as well as a significant Structure  $\times$  Time interaction ( $F_{24,312} = 1.55$ ,  $p = 0.050$ ). Further analyses within each structure revealed a significant effect of Time in the dorsal striatum ( $F_{24,144} = 2.17$ ,  $p = 0.003$ ), but not in the nucleus accumbens ( $F_{24,168} = 1.24$ ,  $p = 0.22$ ). Black filled dots are significantly different from the baseline ( $p < 0.05$ ). B. Individual curves of the dopamine levels in the dorsal striatum (black, top) and the nucleus accumbens (grey, bottom). The right panels show a zoom on the 30-s Odor-Shock pairing (Shift).

218

## 219 Discussion

220 In the present study, we investigated how reversible inactivation of the dorsal striatum  
 221 impacts the learning of novel time intervals using the respiratory frequency to assess male rat's  
 222 temporal expectation in an olfactory fear conditioning paradigm. We further investigated the  
 223 modulations of striatal dopamine extracellular level in that task. Contrary to our hypotheses, we  
 224 found that reversible inactivation of the dorsal striatum was associated with a hastening of the  
 225 adaptation of the respiratory frequency temporal pattern during the odor-shock interval. We also  
 226 showed that the fear conditioning and the learning of a novel interval duration were associated  
 227 with decreases of dopamine level in the dorsal striatum, while no change in dopamine level was  
 228 observed in the nucleus accumbens.

229 In line with the literature (Davis et al., 1989; Díaz-Mataix et al., 2013; Drew et al., 2005;  
 230 Dupin et al., 2020; Hegoburu, Parrot, et al., 2014; Laurent-Demir & Jaffard, 2000; Ohya et  
 231 al., 2006; Tallot et al., 2020), our results support the assumption that learning a time interval  
 232 happens early in conditioning, and further suggest that the expression of that learning can be  
 233 modulated by the dorsal striatum. Indeed, inactivation of the dorsal striatum hastened

234 behavioral adaptation of the animal to a novel duration. Importantly, individual differences  
235 observed in response to the shift under lidocaine inactivation (Figure 2C) were not associated  
236 with differences in the cannulas' placement (Figure S1), suggesting they may instead result  
237 from interindividual variability in timing abilities (see Dupin et al., 2020 for a discussion of timing  
238 abilities and associated brain dynamics). This result suggests that an intact dorsal striatum  
239 allows the preservation of the temporal behavioral response pattern to the previously learned  
240 time interval at the detriment of the shift of the pattern toward the new duration. This may seem  
241 inconsistent with the existing literature. Indeed, electrophysiological recordings in the dorsal  
242 striatum during interval timing tasks have consistently shown that the activity of striatal neurons  
243 is correlated with the animal's behavioral temporal response (Bakhurin et al., 2017; Gouvêa et  
244 al., 2015; Matell et al., 2003; Mello et al., 2015). Furthermore, lesioning or inactivating the  
245 striatum abolishes temporal performance of subjects trained to lever-press for food at a fixed  
246 interval (Meck, 2006), or to discriminate between durations (Gouvêa et al., 2015). However,  
247 these studies have in common that they rely on operant conditioning tasks that require  
248 extensive training of the animal. Importantly, lesions of the dorsal striatum impair the expression  
249 of both innate and learned motor sequences (Bailey & Mair, 2006; Cromwell & Berridge, 1996).  
250 Consequently, in operant tasks, the specific role of the striatum in the encoding of time cannot  
251 be investigated independently from the motor execution of a timed response. Here, using a non-  
252 motor task - Pavlovian fear conditioning - and assessing the animals' behavioral temporal  
253 response through respiration, allowed us to overcome this confound, uncovering a previously  
254 undescribed role for the striatum. Our results also concur with previous findings indicating that  
255 measuring the respiratory response is relevant to understand the brain activity associated with  
256 emotions (Dupin et al., 2019; Moberly et al., 2018), including in the context of interval timing  
257 (Dupin et al., 2020). As animals were first conditioned to a 20-s interval duration and then  
258 shifted to a 30-s duration, one may wonder whether the respiratory patterns observed for these  
259 two durations could reflect non-specific changes in performance with trials repetition instead of  
260 temporal adaptation to the new duration. However, this is unlikely, as we have shown previously  
261 that the respiration curves obtained in animals trained only with a 30-s interval were similar to  
262 those of animals shifted to a 30-s interval after training with a 20-s interval as in the present  
263 study (Boulanger Bertolus et al., 2014; Dupin et al., 2020).

264 Importantly, another difference between the present work and previous studies is that most of  
265 them used appetitive conditioning to probe the role of striatum in interval timing, while we used  
266 an aversive one. Interestingly, Dallérac et al (2017) used a Pavlovian aversive conditioning task,  
267 and reported a decreased synaptic plasticity in the striatum when the expected time interval was

268 shifted to a new duration. That study also showed that the amygdala was activated by a shift to  
269 a novel interval to time (Dallérac et al., 2017; Díaz-Mataix et al., 2013), and its inhibition resulted  
270 in a faster shift toward the new learned duration. Here, we show that, akin to amygdala's  
271 inhibition, inhibiting the striatum resulted in a speeding of the shift of the behavioral pattern  
272 towards the new duration. Together, our data and those of Dallérac et al (2017) suggest that the  
273 disengagement of the dorsal striatum, possibly under the control by the amygdala, might  
274 facilitate flexible temporal expectancy's behaviors in Pavlovian aversive conditioning.

275 Dallérac et al suggested (2017) that this disengagement of the dorsal striatum could be  
276 facilitated by dopamine-regulated plasticity (Calabresi et al., 2007; Tritsch & Sabatini, 2012).  
277 Using intracerebral microdialysis of dopamine, we were able to show that dopamine level in the  
278 dorsal striatum, but not in the nucleus accumbens, decreases when the animal learns the odor-  
279 shock association, and when the time interval is changed. A few studies have shown that the  
280 dorsal striatum might be involved in fear conditioning (Jeanblanc et al., 2003; Kathirvelu &  
281 Colombo, 2013; Matsumoto & Hikosaka, 2009; White & Salinas, 2003). On the other hand,  
282 although a few studies have suggested its possible involvement in Pavlovian fear conditioning  
283 (Fadok et al., 2010; Wendler et al., 2014), the nucleus accumbens has been mostly implicated  
284 in appetitive conditioning (for a review see Schultz, 2016). It might be argued that the observed  
285 decreases in dopamine levels in the dorsal striatum were related to non-temporal cognitive  
286 processes, such as the mere learning of the odor-shock association or the novelty of the  
287 experience. However, changing the interval duration without changing other elements of the  
288 association resulted in a further decrease in dopamine level (highlighted in figure 3B),  
289 supporting the assumption that dopamine in the dorsal striatum is indeed modulated by the  
290 temporal manipulation. Of note, in our study, dopamine level was analyzed every two minutes,  
291 which does not allow to ascribe the observed changes to the arrival of the odor or of the shock  
292 specifically. Nevertheless, this sampling rate permitted a dynamic assessment of dopamine  
293 level that revealed a transient change in response to the shift in duration that had not been  
294 described before. These data suggest that the dopamine decrease observed in the dorsal  
295 striatum could contribute to support two distinct phenomena: the learning of the association  
296 itself (or the development of the behavioral response to that learning), which is associated with  
297 a progressive decrease in dorsostriatal dopamine, and the detection of a change in the temporal  
298 relationships of the elements of the association, which is associated with a transient dopamine  
299 decrease.

300

## 301 Conclusion

302 The findings of our study suggest that inactivation of the dorsal striatum hastens the  
303 behavioral adaptation of the rat's respiratory response to the time interval embedded in an  
304 aversive conditioning. They further indicate that this behavioral adaptation is likely associated  
305 with a decreased release of dopamine in the dorsal striatum. Furthermore, they are in stark  
306 contrast to our initial predictions based on the existing literature and suggest a need to rethink  
307 the role of the striatum and striatal dopamine in interval timing. This discrepancy further calls  
308 attention to the advantage for the field to diversify the tasks and behaviors used to study interval  
309 timing in order to discriminate between the brain structures involved in the learning of time  
310 intervals and those necessary for the expression of these learned time intervals.

311

## 312 Acknowledgements

313 This work was supported by the Centre National de la Recherche Scientifique, by Partner  
314 University Funds "Emotion & Time" and by the LABEX CORTEX (ANR-11-LABX-0042) of  
315 Université de Lyon, within the program "Investissements d'Avenir" (ANR-11-IDEX-0007)  
316 operated by the French National Research Agency. JBB was supported by the Department of  
317 Anesthesiology of the University of Michigan when writing this article. The authors warmly thank  
318 Ms Ounsa Jelassi-Ben Hellal for her continuous care of animals and Ms Morgane Gallet and  
319 Cyrielle Audiane for their technical help.

320

### 321 Author contributions

322 JBB, SP and AMM designed the study, did the experiments, carried out the analyses and wrote  
323 the manuscript; VD discussed the data, commented and edited the manuscript.

324

## 325 References

- 326 Bailey, K. R., & Mair, R. G. (2006). The Role of Striatum in Initiation and Execution of Learned  
327 Action Sequences in Rats. *Journal of Neuroscience*, 26(3), 1016–1025.  
328 <https://doi.org/10.1523/JNEUROSCI.3883-05.2006>  
329 Bakhurin, K. I., Goudar, V., Shobe, J. L., Claar, L. D., Buonomano, D. V., & Masmanidis, S. C.  
330 (2017). Differential Encoding of Time by Prefrontal and Striatal Network Dynamics. *Journal of*  
331 *Neuroscience*, 37(4), 854–870. <https://doi.org/10.1523/JNEUROSCI.1789-16.2016>

- 332 Barnes, T. D., Kubota, Y., Hu, D., Jin, D. Z., & Graybiel, A. M. (2005). Activity of striatal neurons  
333 reflects dynamic encoding and recoding of procedural memories. *Nature*, *437*(7062), 1158–  
334 1161. <https://doi.org/10.1038/nature04053>
- 335 Boulanger Bertolus, J., Hegoburu, C., Ahers, J. L., Londen, E., Rousselot, J., Szyba, K.,  
336 Thévenet, M., Sullivan-Wilson, T. A., Doyère, V., Sullivan, R. M., & Mouly, A.-M. (2014). Infant  
337 rats can learn time intervals before the maturation of the striatum: Evidence from odor fear  
338 conditioning. *Frontiers in Behavioral Neuroscience*, *8*, 176.  
339 <https://doi.org/10.3389/fnbeh.2014.00176>
- 340 Brown, B. L., Hemmes, N. S., & De Vaca, S. C. (1992). Effects of intratrial stimulus change on  
341 fixed-interval performance: The roles of clock and memory processes. *Animal Learning &*  
342 *Behavior*, *20*(1), 83–93.
- 343 Buhusi, C. V., & Meck, W. H. (2005). What makes us tick? Functional and neural mechanisms  
344 of interval timing. *Nature Reviews Neuroscience*, *6*(10), 755–765.  
345 <https://doi.org/10.1038/nrn1764>
- 346 Calabresi, P., Picconi, B., Tozzi, A., & Di Filippo, M. (2007). Dopamine-mediated regulation of  
347 corticostriatal synaptic plasticity. *Trends in Neurosciences*, *30*(5), 211–219.  
348 <https://doi.org/10.1016/j.tins.2007.03.001>
- 349 Cromwell, H. C., & Berridge, K. C. (1996). Implementation of Action Sequences by a Neostriatal  
350 Site: A Lesion Mapping Study of Grooming Syntax. *Journal of Neuroscience*, *16*(10), 3444–  
351 3458. <https://doi.org/10.1523/JNEUROSCI.16-10-03444.1996>
- 352 Dallérac, G., Graupner, M., Knippenberg, J., Martinez, R. C. R., Tavares, T. F., Tallot, L.,  
353 Massioui, N. E., Verschueren, A., Höhn, S., Bertolus, J. B., Reyes, A., LeDoux, J. E., Schafe, G.  
354 E., Diaz-Mataix, L., & Doyère, V. (2017). Updating temporal expectancy of an aversive event  
355 engages striatal plasticity under amygdala control. *Nature Communications*, *8*, 13920.  
356 <https://doi.org/10.1038/ncomms13920>
- 357 Davis, M., Schlesinger, L. S., & Sorenson, C. A. (1989). Temporal specificity of fear  
358 conditioning: Effects of different conditioned stimulus-unconditioned stimulus intervals on the  
359 fear-potentiated startle effect. *J Exp Psychol Anim Behav Process*, *15*(4), 295–310.
- 360 De Corte, B. J., Wagner, L. M., Matell, M. S., & Narayanan, N. S. (2019). Striatal dopamine and  
361 the temporal control of behavior. *Behavioural Brain Research*, *356*, 375–379.  
362 <https://doi.org/10.1016/j.bbr.2018.08.030>
- 363 Diaz-Mataix, L., Ruiz Martinez, R. C., Schafe, G. E., LeDoux, J. E., & Doyère, V. (2013).  
364 Detection of a Temporal Error Triggers Reconsolidation of Amygdala-Dependent Memories.  
365 *Current Biology*, *23*(6), 467–472.
- 366 Drew, M. R., Zupan, B., Cooke, A., Couvillon, P. A., & Balsam, P. D. (2005). Temporal control of  
367 conditioned responding in goldfish. *J Exp Psychol Anim Behav Process*, *31*(1), 31–39.
- 368 Dupin, M., Garcia, S., Boulanger-Bertolus, J., Buonviso, N., & Mouly, A.-M. (2019). New Insights  
369 from 22-kHz Ultrasonic Vocalizations to Characterize Fear Responses: Relationship with  
370 Respiration and Brain Oscillatory Dynamics. *ENeuro*, *6*(2), ENEURO.0065-19.2019.  
371 <https://doi.org/10.1523/ENEURO.0065-19.2019>
- 372 Dupin, M., Garcia, S., Messaoudi, B., Doyère, V., & Mouly, A.-M. (2020). Respiration and brain  
373 neural dynamics associated with interval timing during odor fear learning in rats. *Scientific*  
374 *Reports*, *10*(1), 17643. <https://doi.org/10.1038/s41598-020-74741-2>

- 375 Fadok, J. P., Darvas, M., Dickerson, T. M. K., & Palmiter, R. D. (2010). Long-Term Memory for  
376 Pavlovian Fear Conditioning Requires Dopamine in the Nucleus Accumbens and Basolateral  
377 Amygdala. *PLOS ONE*, 5(9), e12751. <https://doi.org/10.1371/journal.pone.0012751>
- 378 Ferry, B., Gifu, E.-P., Sandu, I., Denoroy, L., & Parrot, S. (2014). Analysis of microdialysate  
379 monoamines, including noradrenaline, dopamine and serotonin, using capillary ultra-high  
380 performance liquid chromatography and electrochemical detection. *Journal of Chromatography*  
381 *B*, 951–952, 52–57. <https://doi.org/10.1016/j.jchromb.2014.01.023>
- 382 Gouvêa, T. S., Monteiro, T., Motiwala, A., Soares, S., Machens, C., & Paton, J. J. (2015).  
383 Striatal dynamics explain duration judgments. *eLife*, 4, e11386.  
384 <https://doi.org/10.7554/eLife.11386>
- 385 Hegoburu, C., Denoroy, L., Mouly, A.-M., & Parrot, S. (2014). High Temporal Resolution Brain  
386 Microdialysis as a Tool to Investigate the Dynamics of Interactions Between Olfactory Cortex  
387 and Amygdala in Odor Fear Conditioning. In T. Heinbockel (Ed.), *Neurochemistry*. InTech.  
388 [http://www.intechopen.com/books/neurochemistry/high-temporal-resolution-brain-microdialysis-](http://www.intechopen.com/books/neurochemistry/high-temporal-resolution-brain-microdialysis-as-a-tool-to-investigate-the-dynamics-of-interactions-b)  
389 [as-a-tool-to-investigate-the-dynamics-of-interactions-b](http://www.intechopen.com/books/neurochemistry/high-temporal-resolution-brain-microdialysis-as-a-tool-to-investigate-the-dynamics-of-interactions-b)
- 390 Hegoburu, C., Parrot, S., Ferreira, G., & Mouly, A.-M. (2014). Differential involvement of  
391 amygdala and cortical NMDA receptors activation upon encoding in odor fear memory. *Learning*  
392 *& Memory*, 21(12), 651–655. <https://doi.org/10.1101/lm.036558.114>
- 393 Hegoburu, C., Sevelinges, Y., Thévenet, M., Gervais, R., Parrot, S., & Mouly, A.-M. (2009).  
394 Differential dynamics of amino acid release in the amygdala and olfactory cortex during odor  
395 fear acquisition as revealed with simultaneous high temporal resolution microdialysis. *Learning*  
396 *& Memory*, 16(11), 687–697. <https://doi.org/10.1101/lm.1584209>
- 397 Hegoburu, C., Shionoya, K., Garcia, S., Messaoudi, B., Thevenet, M., & Mouly, A.-M. (2011).  
398 The RUB cage: Respiration–ultrasonic vocalizations–behavior acquisition setup for assessing  
399 emotional memory in rats. *Frontiers in Behavioral Neuroscience*, 5, 25.  
400 <https://doi.org/10.3389/fnbeh.2011.00025>
- 401 Howard, C. D., Li, H., Geddes, C. E., & Jin, X. (2017). Dynamic Nigrostriatal Dopamine Biases  
402 Action Selection. *Neuron*, 93(6), 1436–1450.e8. <https://doi.org/10.1016/j.neuron.2017.02.029>
- 403 Jeanblanc, J., Hoeltzel, A., & Louilot, A. (2003). Differential involvement of dopamine in the  
404 anterior and posterior parts of the dorsal striatum in latent inhibition. *Neuroscience*, 118(1), 233–  
405 241. [https://doi.org/10.1016/S0306-4522\(02\)00823-0](https://doi.org/10.1016/S0306-4522(02)00823-0)
- 406 Kathirvelu, B., & Colombo, P. J. (2013). Effects of lentivirus-mediated CREB expression in the  
407 dorsolateral striatum: Memory enhancement and evidence for competitive and cooperative  
408 interactions with the hippocampus. *Hippocampus*, 23(11), 1066–1074.  
409 <https://doi.org/10.1002/hipo.22188>
- 410 Kirkpatrick, K., & Balsam, P. D. (2016). Associative learning and timing. *Current Opinion in*  
411 *Behavioral Sciences*, 8, 181–185. <https://doi.org/10.1016/j.cobeha.2016.02.023>
- 412 Koralek, A. C., Costa, R. M., & Carmena, J. M. (2013). Temporally Precise Cell-Specific  
413 Coherence Develops in Corticostriatal Networks during Learning. *Neuron*, 79(5), 865–872.  
414 <https://doi.org/10.1016/j.neuron.2013.06.047>
- 415 Laurent-Demir, C., & Jaffard, R. (2000). Paradoxical facilitatory effect of fornix lesions on  
416 acquisition of contextual fear conditioning in mice. *Behavioural Brain Research*, 107(1), 85–91.  
417 [https://doi.org/10.1016/S0166-4328\(99\)00111-4](https://doi.org/10.1016/S0166-4328(99)00111-4)



- 418 Martiros, N., Burgess, A. A., & Graybiel, A. M. (2018). Inversely Active Striatal Projection  
419 Neurons and Interneurons Selectively Delimit Useful Behavioral Sequences. *Current Biology*,  
420 28(4), 560-573.e5. <https://doi.org/10.1016/j.cub.2018.01.031>
- 421 Matell, M. S., Meck, W. H., & Nicolelis, M. A. L. (2003). Interval timing and the encoding of  
422 signal duration by ensembles of cortical and striatal neurons. *Behavioral Neuroscience*, 117(4),  
423 760–773. <https://doi.org/10.1037/0735-7044.117.4.760>
- 424 Matsumoto, M., & Hikosaka, O. (2009). Two types of dopamine neuron distinctly convey positive  
425 and negative motivational signals. *Nature*, 459(7248), 837–841.  
426 <https://doi.org/10.1038/nature08028>
- 427 Meck, W. H. (2006). Neuroanatomical localization of an internal clock: A functional link between  
428 mesolimbic, nigrostriatal, and mesocortical dopaminergic systems. *Brain Research*, 1109(1),  
429 93–107. <https://doi.org/10.1016/j.brainres.2006.06.031>
- 430 Mello, G. B. M., Soares, S., & Paton, J. J. (2015). A Scalable Population Code for Time in the  
431 Striatum. *Current Biology*, 25(9), 1113–1122. <https://doi.org/10.1016/j.cub.2015.02.036>
- 432 Merchant, H., Harrington, D. L., & Meck, W. H. (2013). Neural Basis of the Perception and  
433 Estimation of Time. *Annual Review of Neuroscience*, 36(1), 313–336.  
434 <https://doi.org/10.1146/annurev-neuro-062012-170349>
- 435 Moberly, A. H., Schreck, M., Bhattarai, J. P., Zweifel, L. S., Luo, W., & Ma, M. (2018). Olfactory  
436 inputs modulate respiration-related rhythmic activity in the prefrontal cortex and freezing  
437 behavior. *Nature Communications*, 9(1), 1528. <https://doi.org/10.1038/s41467-018-03988-1>
- 438 Molet, M., & Miller, R. R. (2014). Timing: An attribute of associative learning. *Behavioural*  
439 *Processes*, 101, 4–14. <https://doi.org/10.1016/j.beproc.2013.05.015>
- 440 Ohyama, T., Nores, W. L., Medina, J. F., Riusech, F. A., & Mauk, M. D. (2006). Learning-  
441 induced plasticity in deep cerebellar nucleus. *The Journal of Neuroscience*, 26(49), 12656–  
442 12663.
- 443 Parrot, S., Sauvinet, V., Riban, V., Depaulis, A., Renaud, B., & Denoroy, L. (2004). High  
444 temporal resolution for in vivo monitoring of neurotransmitters in awake epileptic rats using brain  
445 microdialysis and capillary electrophoresis with laser-induced fluorescence detection. *Journal of*  
446 *Neuroscience Methods*, 140(1), 29–38. <https://doi.org/10.1016/j.jneumeth.2004.03.025>
- 447 Paxinos, G., & Watson, C. (2014). *The rat brain in stereotaxic coordinates* (Seventh edition).  
448 Academic Press.
- 449 Roux, S. G., Garcia, S., Bertrand, B., Cenier, T., Vigouroux, M., Buonviso, N., & Litaudon, P.  
450 (2006). Respiratory cycle as time basis: An improved method for averaging olfactory neural  
451 events. *Journal of Neuroscience Methods*, 152(1–2), 173–178.  
452 <https://doi.org/10.1016/j.jneumeth.2005.09.004>
- 453 Schultz, W. (2016). Reward functions of the basal ganglia. *Journal of Neural Transmission*,  
454 123(7), 679–693. <https://doi.org/10.1007/s00702-016-1510-0>
- 455 Shionoya, K., Hegoburu, C., Brown, B. L., Sullivan, R. M., Doyère, V., & Mouly, A.-M. (2013).  
456 It's time to fear! Interval timing in odor fear conditioning in rats. *Frontiers in Behavioral*  
457 *Neuroscience*, 7, 128. <https://doi.org/10.3389/fnbeh.2013.00128>
- 458 Soares, S., Atallah, B. V., & Paton, J. J. (2016). Midbrain dopamine neurons control judgment of  
459 time. *Science*, 354(6317), 1273–1277. <https://doi.org/10.1126/science.aah5234>
- 460 Tallot, L., & Doyère, V. (2020). Neural encoding of time in the animal brain. *Neuroscience &*  
461 *Biobehavioral Reviews*, 115, 146–163. <https://doi.org/10.1016/j.neubiorev.2019.12.033>

462 Tallot, L., Graupner, M., Diaz-Mataix, L., & Doyère, V. (2020). Beyond freezing: Temporal  
463 expectancy of an aversive event engages the 2 amydgalo-prefronto-dorsostriatal network.  
464 *Cerebral Cortex*, *in press*.

465 Tritsch, N. X., & Sabatini, B. L. (2012). Dopaminergic Modulation of Synaptic Transmission in  
466 Cortex and Striatum. *Neuron*, *76*(1), 33–50. <https://doi.org/10.1016/j.neuron.2012.09.023>

467 Wendler, E., Gaspar, J. C. C., Ferreira, T. L., Barbiero, J. K., Andreatini, R., Vital, M. A. B. F.,  
468 Blaha, C. D., Winn, P., & Da Cunha, C. (2014). The roles of the nucleus accumbens core,  
469 dorsomedial striatum, and dorsolateral striatum in learning: Performance and extinction of  
470 Pavlovian fear-conditioned responses and instrumental avoidance responses. *Neurobiology of*  
471 *Learning and Memory*, *109*, 27–36. <https://doi.org/10.1016/j.nlm.2013.11.009>

472 White, N. M., & Salinas, J. A. (2003). Mnemonic functions of dorsal striatum and hippocampus  
473 in aversive conditioning. *Behavioural Brain Research*, *142*(1), 99–107.  
474 [https://doi.org/10.1016/S0166-4328\(02\)00402-3](https://doi.org/10.1016/S0166-4328(02)00402-3)  
475

## 476 Supplementary Material

### 477 Supplementary Methods

#### 478 **Experiment 1: Inactivation of the dorsal striatum during odor fear conditioning**

##### 479 **Animals**

480 Data were collected from 27 male Long Evans rats (Janvier, France), weighing 250-300 g at  
481 the start of the experimentation (2 animals were used and excluded due to wrong positioning of  
482 the injection cannulae). They were housed in pairs at 23°C and maintained under a 12h light–  
483 dark cycle (lights on from 7:00 a.m. to 7:00 p.m.). Experiments were performed during the light  
484 phase. Food and water were available *ad libitum*. All experiments and surgical procedures were  
485 conducted in strict accordance with the 2010/63/EU Council Directive Decree and the French  
486 National Committee (87/848) for care and use of laboratory animals. The experiments were  
487 carried out under the approval of Direction of Veterinary Service (#69000692), and care was  
488 taken at all stages to minimize stress and discomfort to the animals.

##### 489 **Surgery**

490 Animals were anesthetized with Equithesin, a mixture of chloral hydrate (127 mg/kg, i.p.) and  
491 sodium pentobarbital (30 mg/kg, i.p.), administrated by intraperitoneal injection, and placed in a  
492 stereotaxic frame (Stoelting, USA). Before head skin incision, lidocaine (1% solution; Sigma-  
493 Aldrich, Saint-Quentin Fallavier, France) was administered subcutaneously for local anesthesia.  
494 Rats were implanted bilaterally with stainless steel guide cannulae (23G, Phymep, France)  
495 positioned 1.5 mm above the targeted location of the injection needle tips in the dorsal striatum,  
496 whose final stereotaxic coordinates from Paxinos and Watson (2014) relative to bregma, were  
497 as follows: AP: 0.6 mm; L: 2.8 mm; DV: -4.5 mm from dura. The cannulae were fixed to the skull  
498 with dental acrylic cement and anchored with surgical screws. Stylets of the length of the guide  
499 cannula were inserted in it to prevent clogging. The animals were allowed two weeks of post-  
500 surgical recovery.

##### 501 **Experimental apparatus**

502 The apparatus has been described in a previous study (Hegoburu et al., 2011). It consisted  
503 of a whole-body customized plethysmograph (diameter 20cm, height 30cm, EmkaTechnologies,  
504 France) placed in a sound-attenuating cage. The ceiling of the plethysmograph was equipped  
505 with a tower which allowed the introduction of three Tygon tubing connected to a programmable  
506 custom olfactometer. Deodorized air flowed constantly through the cage (2L/min), a ventilation  
507 pump drawing air out of the bottom of the plethysmograph. When programmed, an odor  
508 (McCormick Pure Peppermint; 2 L/min; 1:10 peppermint vapor to air) was introduced in the air

509 stream through the switching of a solenoid valve (Fluid automation systems, CH-1290 Versoix,  
510 Switzerland). The bottom of the plethysmograph was equipped with a shock floor connected to  
511 a programmable Coulbourn shocker (Bilaney Consultants GmbH, Düsseldorf, Germany).  
512 Animal's behavior was monitored with four video cameras (B/W CMOS PINHOLE camera,  
513 Velleman, Belgium) placed at each corner of the sound-attenuating cage.

### 514 **Experimental paradigm**

515 Subjects were submitted to a 7d experimental paradigm consisting of 4d of Habituation to the  
516 conditioning cage (20min/day), followed by a Conditioning session, a Retention test and a Shift  
517 session (Figure 1A) at 24h intervals. During the Conditioning session, the animals were allowed  
518 free exploration for 4min, then received ten odor-shock trials during which the conditioned  
519 stimulus (CS), a peppermint odor, was introduced into the cage for 20s, the last second of which  
520 overlapped with the delivery of a 0.4 mA foot-shock, the unconditioned stimulus (US), with an  
521 intertrial interval of 4 minutes. During the Retention test, after a 2-min odor-free period in the  
522 experimental cage (equipped with new visual cues and with a plastic floor to avoid contextual  
523 fear expression), the CS was then presented 6 times for 20s with a 1-min intertrial interval.  
524 During the Shift session, the animals were re-conditioned by receiving a first odor-shock trial  
525 using the previously learned 20s interval, after which nine odor-shock trials were carried out with  
526 a new (30s) CS-US interval. During the different steps of the experiment, the animal's behavior  
527 and respiration were continuously monitored and recorded for offline analysis.

### 528 **Pharmacological inactivation of the dorsal striatum**

529 Five minutes prior to the Conditioning and Shift sessions, animals were injected with 0.5  $\mu$ L  
530 of either lidocaine (2%, Sigma-Aldrich France, dissolved in sterile saline 0.9%, injection rate 0.5  
531  $\mu$ L/min, Lidocaine group, n = 13) or saline (Control group, n = 14). Injection needles (30G)  
532 extended 1.5 mm from the tip of the guide cannulae, and were connected via polyethylene  
533 tubing to two 10-mL Hamilton microsyringes driven by an automated microinfusion pump  
534 (Harvard Apparatus, France). After the injection, the needles were left in position for an  
535 additional minute to enable diffusion of the solution into the brain tissue.

536 At the end of the experiment, the animals were sacrificed with a lethal dose of pentobarbital  
537 for histological verification of the cannulae tips.

### 538 **Data acquisition and pre-processing**

539 The respiratory signal collected from the plethysmograph was amplified and sent to an  
540 acquisition card (MC-1608FS, Measurement Computing, USA; Sampling rate = 1000 Hz) for  
541 storage and offline analysis. The detection of the respiratory cycles was achieved using an  
542 algorithm described in a previous study (Roux et al., 2006). Momentary respiratory frequency

543 was determined as the inverse of the respiratory cycle (inspiration plus expiration) duration,  
544 averaged on a second by second basis, and synchronized to the odor arrival and shock delivery  
545 using TTL signals. The video signal collected through the four video cameras was acquired with  
546 homemade acquisition software using the Matrox Imaging Library and a Matrox acquisition card  
547 (Morphis QxT 16VD/M4, Matrox video, UK). Offline, the animal's freezing behavior was  
548 automatically encoded via a LabView homemade software that had been validated by  
549 comparison to hand scoring by an experimenter blind to the rat's group. Data were analyzed  
550 using scripts in Python.

### 551 **Data analysis**

552 We assessed the effects of treatment on the temporal dynamics of the respiratory frequency  
553 in presence of the CS odor. For this analysis, the time course, in 1-second time bins, of the  
554 respiratory frequency during the 19 first seconds of the odor presentation was compared using a  
555 two-way ANOVA with the group (Lidocaine vs Control) as an independent factor and the time  
556 (seconds 1 to 19) as a repeated measure factor. Post-hoc pairwise comparisons were then  
557 carried out when allowed by the ANOVA results. For all statistical comparisons performed, the  
558 significance level was set at 0.05.

559 During the Retention test, the conditioned fear response was assessed by comparing the  
560 amount of freezing per minute before and during the odor introduction, using a two-way ANOVA  
561 with the group as an independent factor and the period (Pre-Odor vs Odor) as a repeated  
562 measure factor. Pairwise comparisons were then carried out when allowed by the ANOVA  
563 results.

564

## 565 **EXPERIMENT 2: Microdialysis during odor fear conditioning**

### 566 **Animals**

567 Twenty-one male Long Evans rats (Janvier Labs, France), weighing 250-300 g at the start of  
568 the experimentation were used for this experiment (6 animals were excluded for wrong  
569 positioning of the probe or technical problem during the session). They were individually housed  
570 in the environmental conditions described above.

### 571 **Surgery**

572 The animals were anesthetized with ketamine (70 mg/kg) and xylazine (6 mg/kg)  
573 administrated by intraperitoneal injection, and placed in a stereotaxic frame (Stoelting, USA).  
574 Before head skin incision, lidocaine (1% solution; Sigma-Aldrich, Saint-Quentin Fallavier,  
575 France) was administered subcutaneously for local anesthesia. The rats were implanted  
576 unilaterally (left side) with a guide cannula for microdialysis probe (CMA12, Phymep, France)

577 and positioned 3.5 mm above the targeted location of the dialysis membrane tip, whose final  
578 stereotaxic coordinates from (Paxinos & Watson, 2014), relative to bregma, were as follows:  
579 dorsal striatum AP: 0.6 mm; L: 3.5 mm; DV: -5.7 mm from dura) or nucleus accumbens (AP: 2  
580 mm; L: 1.2 mm; DV: -7.6 mm from dura). The cannula was fixed to the skull with dental acrylic  
581 cement and anchored with two surgical screws. Stylets of the length of the guide cannula were  
582 inserted in it to prevent clogging. The animals were allowed 2 weeks of postsurgical recovery  
583 during which they were regularly handled and habituated to the experimental chamber for 20  
584 min daily during the four days preceding the microdialysis experiment.

### 585 **Microdialysis procedure**

586 Concentric microdialysis probes were constructed in our laboratory from regenerated  
587 cellulose dialysis tubing (Spectra/Por hollow fiber; ref #132274, 225 mm O.D., 2 mm as active  
588 length, Spectrum Medical Industries) and fused-silica capillary tubing (90 cm and 80 cm long for  
589 inlet and outlet, respectively, 40 mm i.d., 105 mm O.D., Polymicro Technology). The body of the  
590 probe consisted of a 26-G stainless steel tubing that was glued on a flat probe holder (Harvard)  
591 adaptable to the CMA12 cannula-guide. After being flushed, the probes were continuously  
592 infused with artificial cerebrospinal fluid (aCSF: 145.0 mmol/L NaCl, 2.70 mmol/L KCl, 1.0  
593 mmol/L MgCl<sub>2</sub>, 1.20mmol/L CaCl<sub>2</sub>, 0.45mmol/L NaH<sub>2</sub>PO<sub>4</sub>, 2.33mmol/L Na<sub>2</sub>HPO<sub>4</sub>, pH 7.4) using  
594 a 500- $\mu$ L Hamilton syringe mounted on an infusion pump (Harvard Model PHD 2000 Infuse).  
595 The aCSF was infused at 1  $\mu$ L/min for the present experiments to avoid ultrafiltration.

596 Microdialysis on behaving animals requires long tubing (0.9- 1.2 m). At a given flow rate, the  
597 dead volume of these tubing (i.e. the tubing volume between the dialysis membrane and the  
598 outlet of the probe) results in a dead time that must be taken into account to accurately correlate  
599 the neurochemical data with the behavioral events (Parrot et al., 2004; Hegoburu et al., 2009;  
600 Hegoburu, Denoroy, et al., 2014), estimated to be ~ 2 min.

### 601 **Experimental apparatus**

602 The apparatus has been described in a previous study (Hegoburu et al., 2009). It consisted  
603 of a Plexiglas transparent cylinder (diameter = 21 cm, height = 21.5 cm) with a lateral door  
604 placed in a sound-attenuating cage. The ceiling of the cage was perforated with a central  
605 aperture allowing the passage of microdialysis tubing and the branching of three Tygon tubing  
606 connected to the programmable custom olfactometer described for experiment 1. The bottom of  
607 the cage was equipped with the shock floor as described above and connected to an exhaust  
608 fan allowing continuous evacuation of the odorant stream from the cage. Animal's behavior was  
609 monitored with four video cameras (B/W CMOS PINHOLE camera, Velleman, Belgium) placed  
610 at each corner of the sound-attenuating cage.

## 611 **Experimental paradigm**

612 On the day of the experiment, the microdialysis probe was inserted into the guide-cannula  
613 (Dorsal striatum group : n = 7, Nucleus Accumbens group: n = 8) and the animal was introduced  
614 in the experimental cage described in experiment 1. After a 3-hour probe equilibration period,  
615 the conditioning session was initiated (Figure 1B). Six odor-shock pairings with a 20-s CS-US  
616 interval were presented, with an intertrial interval of 4 minutes. An additional pairing was then  
617 presented using a 30s CS-US interval. All along the session, dialysates were collected every 2  
618 min in PCR tubes previously rinsed with an acidic preservative medium. The samples were  
619 immediately stored at -20°C. Once all the samples were collected, they were transferred into a -  
620 30°C freezer until analysis. These procedures permit to limit greatly the degradation of DA from  
621 oxidation due to heat, light and the non-acidic aCSF matrix. Of note, even though the paradigm  
622 was conducted in a plethysmograph, the microdialysis tubing prevented the sealing of the  
623 plethysmograph and thus the collection of the respiratory signal in this experiment.

## 624 **Microdialysis samples analysis**

625 The dialysates were analyzed using ultra-high-performance liquid chromatography (UHPLC).  
626 Dopamine, 1-octanesulfonic acid (OSA), triethylamine (TEA), ethylene–diamine–tetra-acetic  
627 acid (EDTA) disodium salt, and sodium hydroxide were purchased from Sigma (St. Louis, MO,  
628 USA), potassium dihydrogenphosphate and methanol U-HPLC gradient grade from Fisher  
629 Scientific (Loughborough, UK). Ultrapure water was produced using a Milli-Q system (Millipore,  
630 Bedford, MA, USA). Standard solutions of 1 mmol/L of dopamine were stored at -30°C as  
631 aliquots in 0.1 mol/L hydrochloric acid.

632 The UHPLC system consisted of a Prominence degasser, a LC-30 AD pump and a SIL-30AC  
633 autosampler (Shimadzu, Tokyo, Japan). Detection was carried out at 40°C using a Decade II  
634 electrochemical detector fitted with a 0.7 mm glass carbon working electrode, a salt-bridge  
635 Ag/AgCl reference electrode, and a 25 m spacer (cell volume 80 nL, Antec, Leyden, The  
636 Netherlands). Separations were performed at 40°C (in detector oven) using a 100 × 0.32 mm  
637 Kappa Hypersil Gold 1.9 m C18 column (Thermo Scientific). The mobile phase, which was  
638 adapted from Ferry et al. (2014), consisted of 0.14 mol/L potassium phosphate, 0.1 mmol/L  
639 EDTA, 6 mmol/L OSA, 0.01% TEA (v/v), pH adjusted to 5 with 10 mmol/L sodium hydroxide, 6%  
640 methanol, filtered through a 0.22 m cellulose acetate membrane before elution at 8.5 µL/ min.  
641 Analytes were detected at an oxidation potential of 700 mV versus the reference electrode.  
642 Chromatograms were acquired at a rate of 10 Hz using Lab Solutions software. The acquisition  
643 time was 22 min. The injection volume was 1 µL. The sample analysis started the same day of  
644 the microdialysis collection to prevent dopamine degradation as much as possible, as 25

645 samples were collected per animal. In some rare cases of chromatographic matters, the  
646 analysis was postponed, but not later than 2 days after collection. On the day of analysis, the  
647 samples were placed in the autosampler and kept at +4°C before injection. Concentrations of  
648 dopamine were calculated using a day calibration curve. Data were expressed as percentage  
649 (mean  $\pm$  SEM) of the baseline obtained by averaging the dopamine concentrations measured in  
650 the seven samples collected before the start of the conditioning session. Changes in dopamine  
651 concentration were then analyzed using a two-way ANOVA with the structure (dorsal striatum or  
652 nucleus accumbens) as an independent factor and the time as a repeated measure factor. Post-  
653 hoc pairwise comparisons were then carried out when allowed by the ANOVA results.

654

## 655 Supplementary Figures

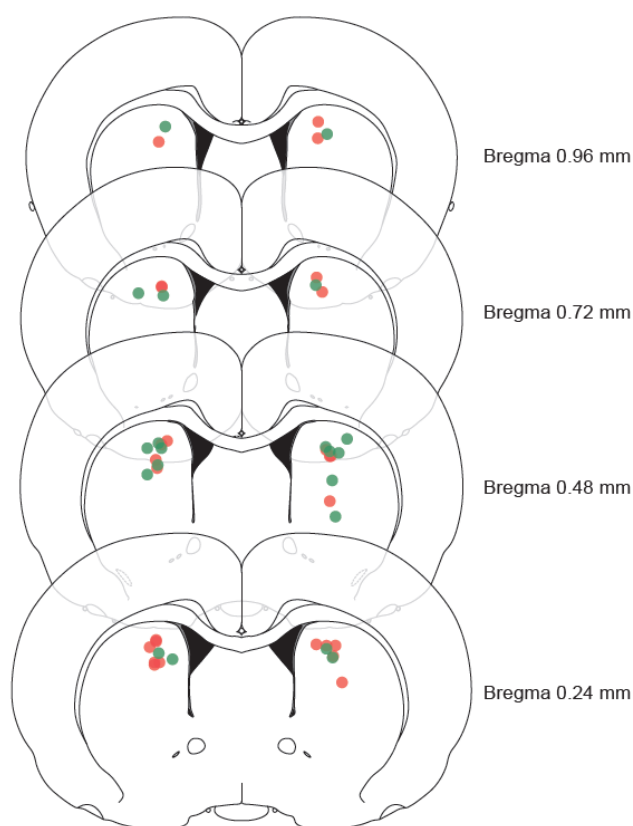

**Figure S1:** Localization of the tip of the injectors in Experiment 1 for rats in the Lidocaine group (red) and the Control group (green).

656



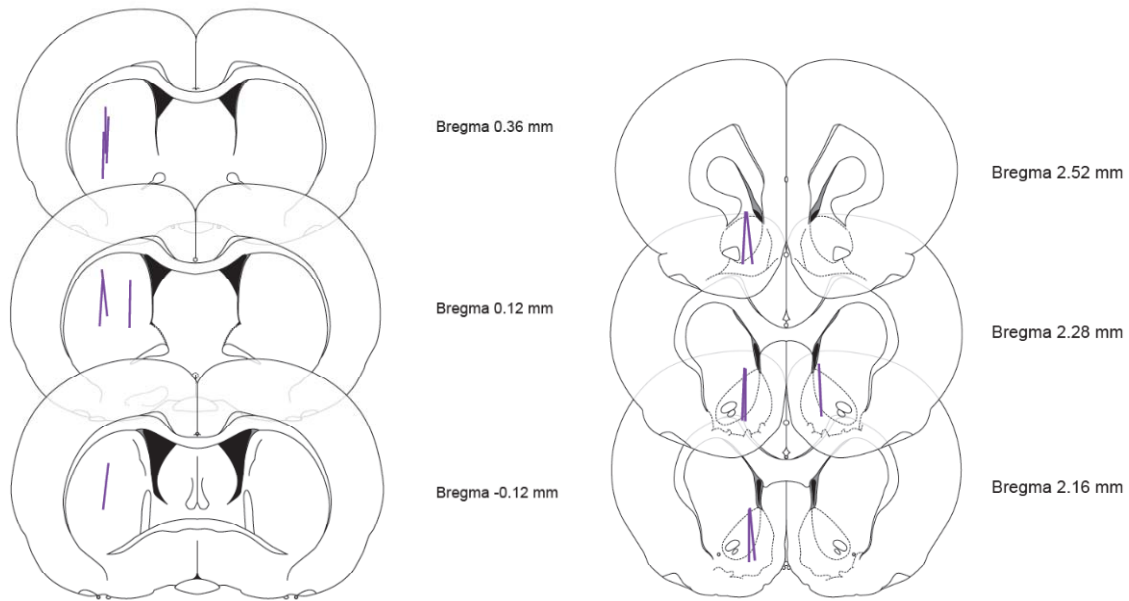

**Figure S2:** Localization of the microdialysis membranes in Experiments 2 for the rats implanted in the dorsal striatum (left panel) and the nucleus accumbens (right panel).

657

### A. Conditioning session - last trials

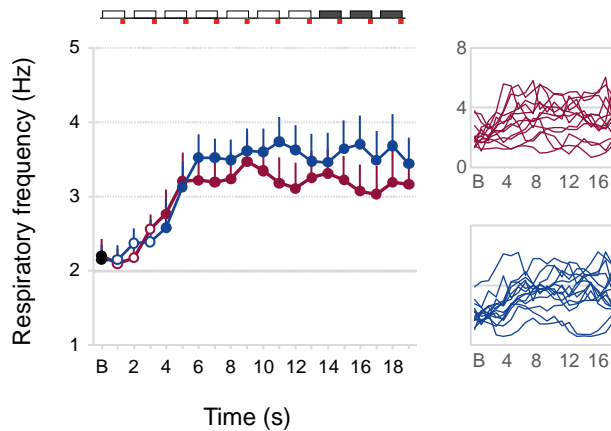

**Figure S3:** Time course of the respiratory frequency during (A) the last 3 trials of the conditioning session, (B) the 6 trials of the retention test, (C) the first 2 trials of the shift session (as shown on the schema over the graphs), for the Lidocaine (red) and Control groups (blue). ANOVAs with independent factor Group and repeated factor Time show no Group x Time interaction for the last three trials of the Conditioning session:  $F_{18,432} = 1.08$ ,  $p = 0.37$ ; or for the 2 first trials of the Shift session:  $F_{18,450} = 1.16$ ,  $p = 0.29$ . Filled dots are significantly different from baseline ( $p < 0.05$ ), inserts are the respiratory frequency of individual rats.

### B. Retention session

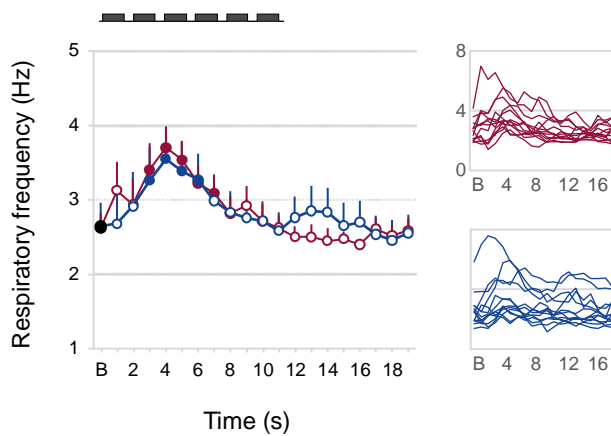

### C. Shift session - first trials

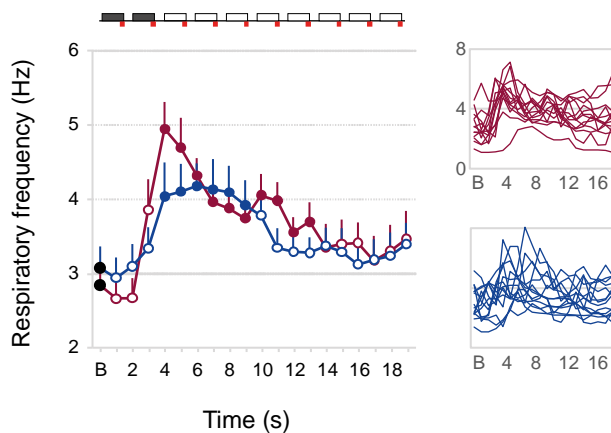

○ Lidocaine      ○ Control

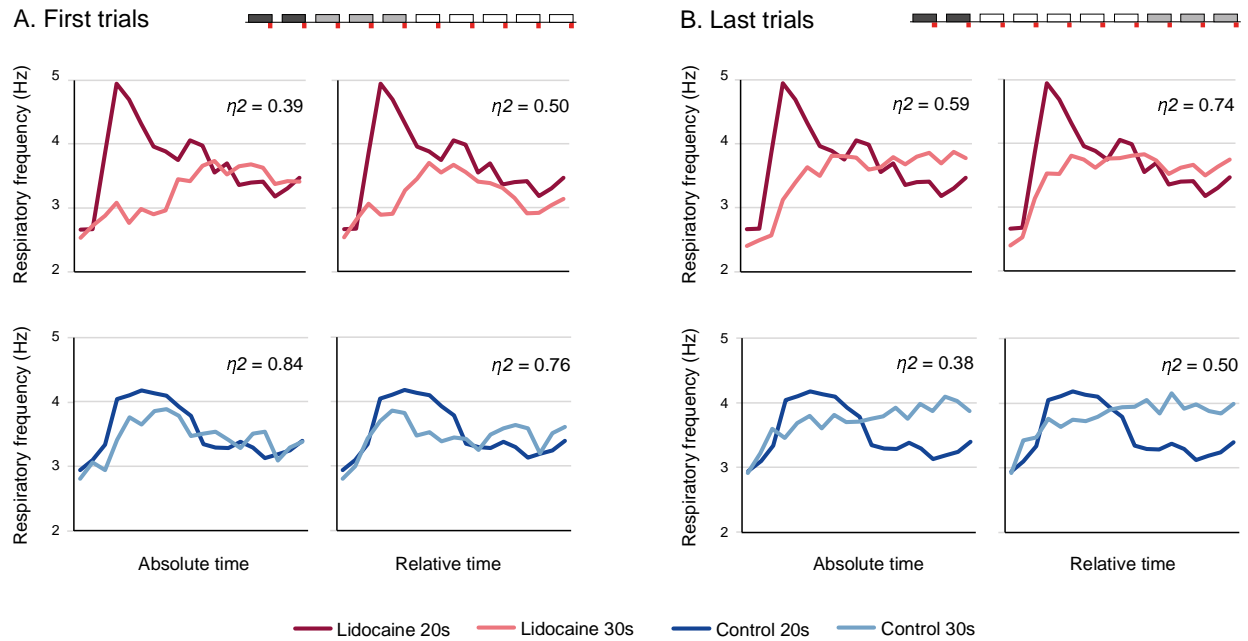

**Figure S4:** Testing the scalar property of the respiratory frequency curve during the 20-s (in dark colors; first 2 trials) versus 30-s (in light colors) Odor-Shock interval at (A) the early stage of the Shift session of Experiment 1 (first 3 trials after the rats have been exposed to the 30s interval), and (B) the last trials of the shift, for the Lidocaine group (upper panel, red) and the Control group (lower panel, blue). In order to assess scalar timing quantitatively, in each group, the time axis 30-s Odor-shock interval curves was multiplicatively rescaled to superpose with the 20-s interval (relative time). Superposition between the two curves was indexed by eta-square ( $\eta^2$ ), compared with the superposition index of non-rescaled curves (absolute time), and indicated in the upper right corner of each graph.

658
